# Supplementary material for: Autograft versus allograft in anterior cruciate ligament reconstruction: A meta-analysis with trial sequential analysis
Source: PubMed Central journal article supplement (PMC5044918; doi:10.1097/md.0000000000004936), 2016-09-23
Supplement: medi-95-e4936-s001.pdf [file medi-95-e4936-s001.pdf]

Supplementary Figure S1 Meta-regression analysis of influence of mean age on clinical failure. The circles represent each study. The size of the circle represents the power of the study. The solid line indicates the weighted regression line. RR relative risk

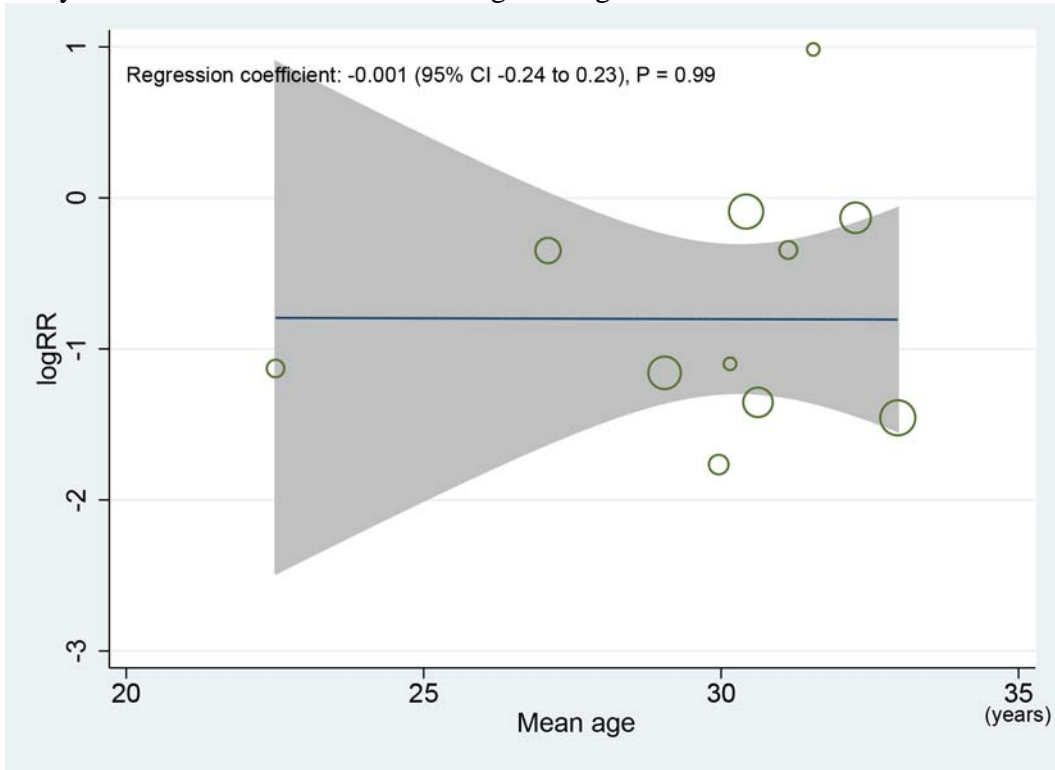

Supplementary Figure S2 Meta-regression analysis of influence of male ratio on clinical failure. The circles represent each study. The size of the circle represents the power of the study. The solid line indicates the weighted regression line. RR relative risk

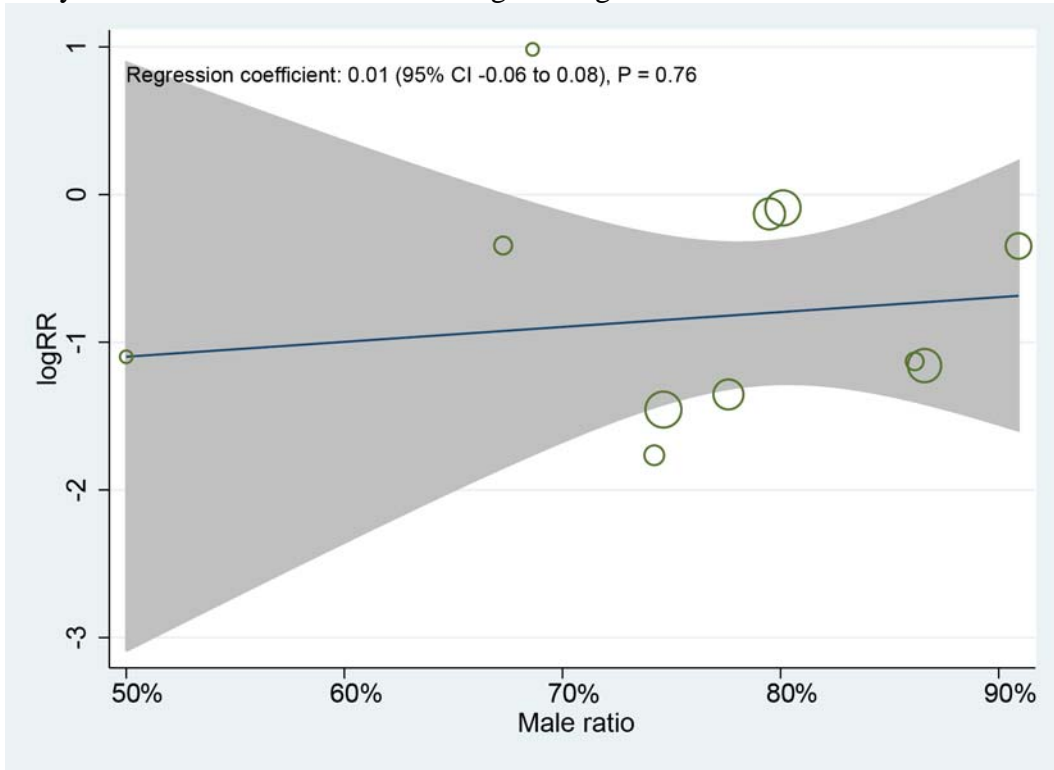

Supplementary Figure S3 Funnel plot of clinical failure of the included studies comparing autograft with allograft. RR relative risk

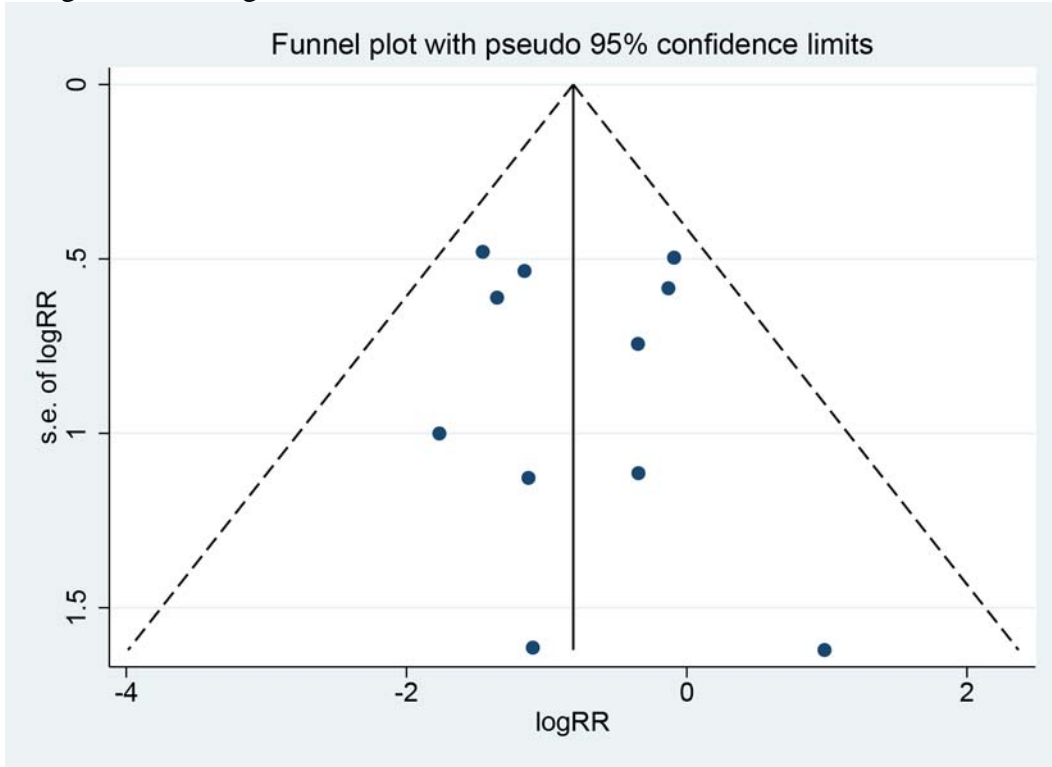

Supplementary Figure S4 Funnel plot of overall IKDC level of the included studies comparing autograft with allograft. RR relative risk, IKDC International Knee Documentation Committee

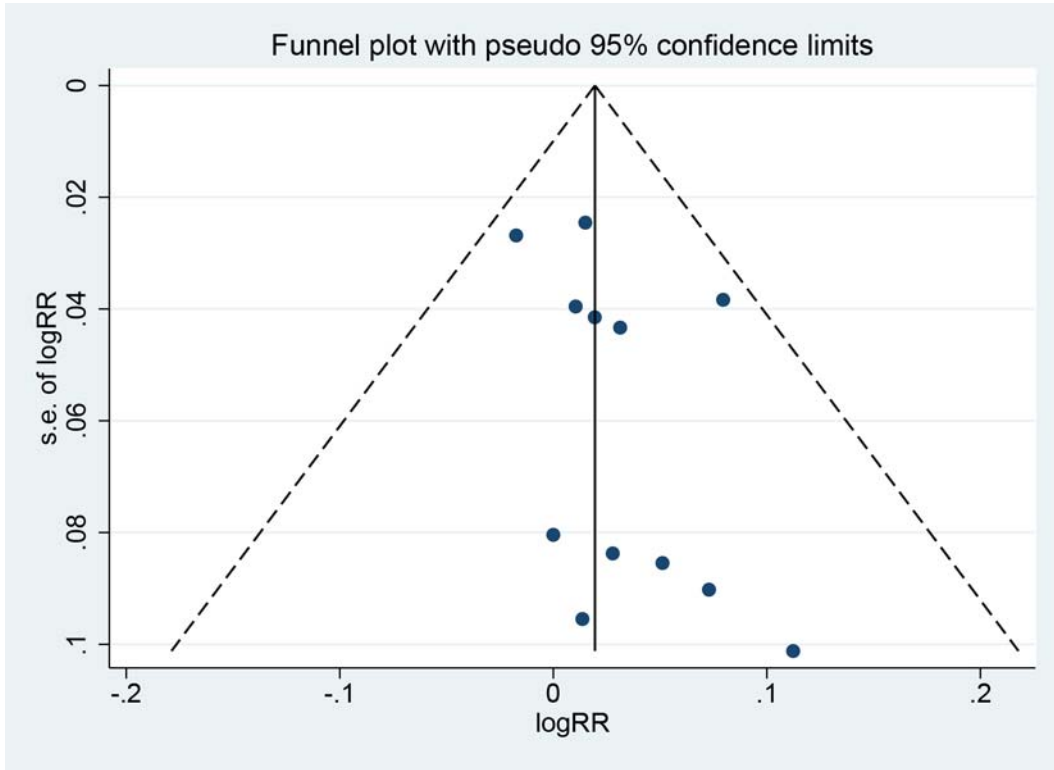

Supplementary Figure S5 Funnel plot of Lysholm score of the included studies comparing autograft with allograft. MD mean difference

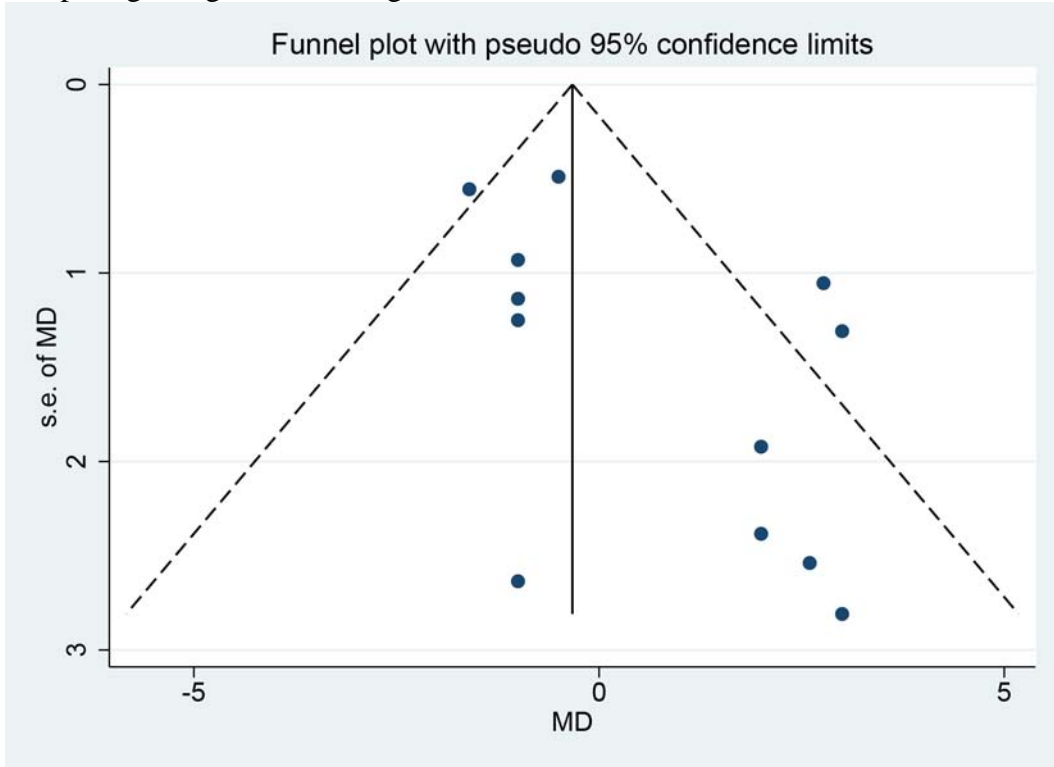

Supplementary Figure S6 Funnel plot of Tegner score of the included studies comparing autograft with allograft. MD mean difference

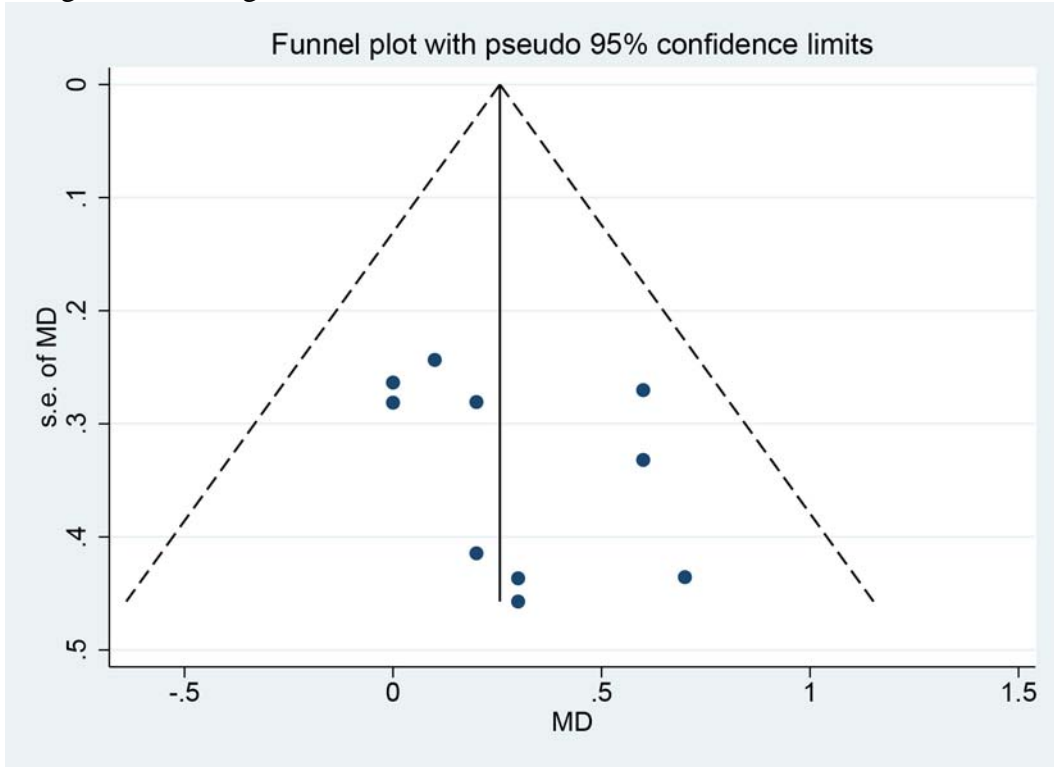

Supplementary Figure S7 Funnel plot of pivot-shift test of the included studies comparing autograft with allograft. RR relative risk

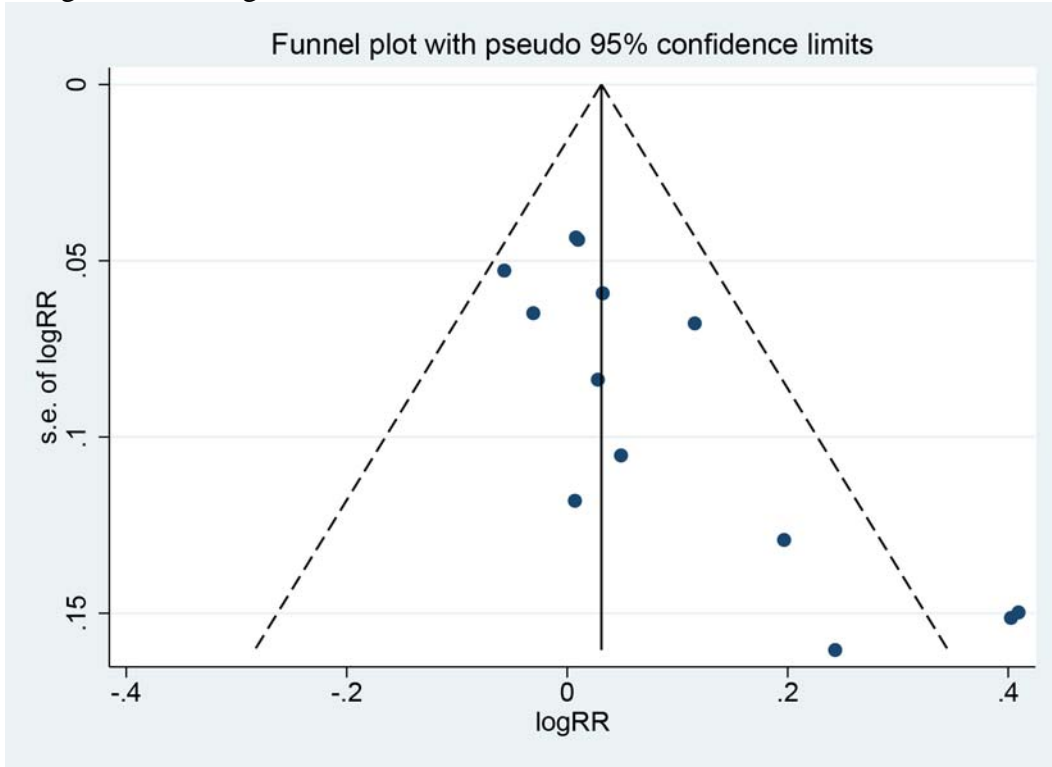

Supplementary Figure S8 Funnel plot of Lachman test of the included studies comparing autograft with allograft. RR relative risk

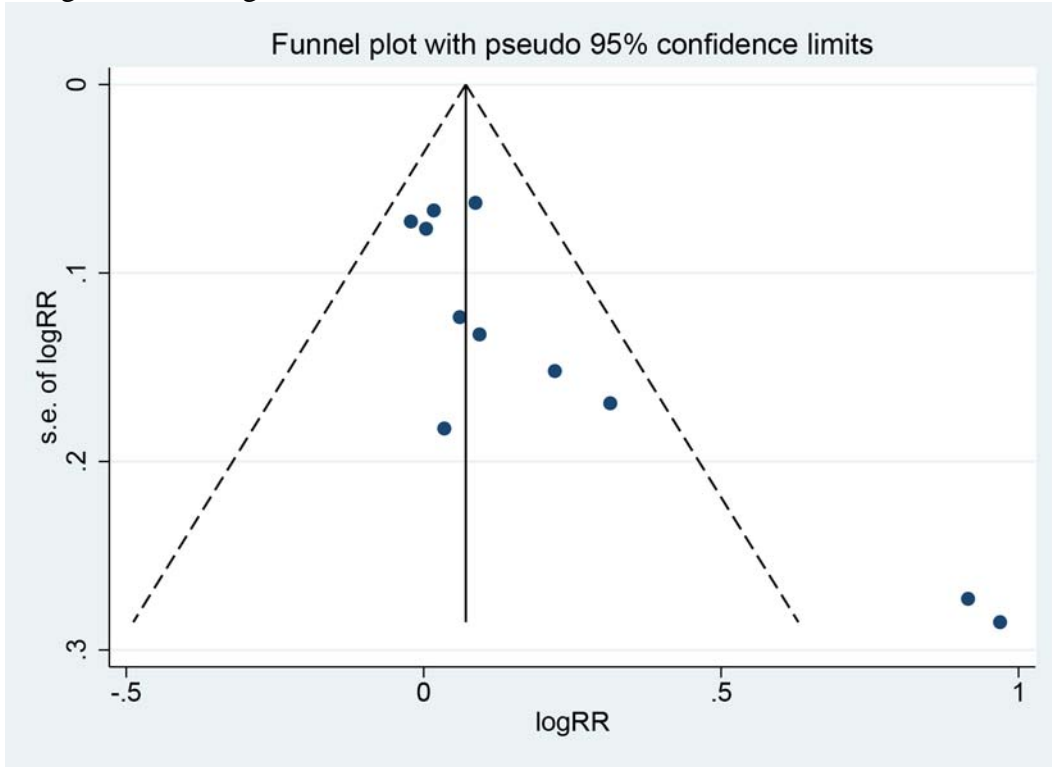



Supplementary Table S1 Search strategies

**PubMed**

**Searched on:** January 31, 2016

**Results:** 159

---

| <b>Search</b> | <b>Query</b>                                                                                                                       |
|---------------|------------------------------------------------------------------------------------------------------------------------------------|
| #1            | "Randomized Controlled Trial" [Publication Type] OR "Controlled Clinical Trial" [Publication Type]                                 |
| #2            | ((random*[Title/Abstract]) OR placebo[Title/Abstract]) OR trial*[Title/Abstract]) OR group*[Title/Abstract]                        |
| #3            | #1 OR #2                                                                                                                           |
| #4            | "Animals"[Mesh]                                                                                                                    |
| #5            | "Humans"[Mesh]                                                                                                                     |
| #6            | #4 NOT #5                                                                                                                          |
| #7            | #3 NOT #6                                                                                                                          |
| #8            | "Anterior Cruciate Ligament"[Mesh] OR "Anterior Cruciate Ligament Reconstruction"[Mesh]                                            |
| #9            | ((Anterior Cruciate Ligament[Title/Abstract]) OR Anterior Cruciate Ligament Reconstruction[Title/Abstract]) OR ACL[Title/Abstract] |
| #10           | ((anterior[Title/Abstract]) AND cruciate*[Title/Abstract]) AND ligament*[Title/Abstract]                                           |
| #11           | #8 OR #9 OR #10                                                                                                                    |
| #12           | "Transplantation, Autologous"[Mesh]                                                                                                |
| #13           | ((Autologous[Title/Abstract]) OR autogenous[Title/Abstract]) OR autotransplant*[Title/Abstract]) OR autograft*[Title/Abstract]     |
| #14           | #12 OR #13                                                                                                                         |
| #15           | "Transplantation, Homologous"[Mesh]                                                                                                |
| #16           | ((Allograft*[Title/Abstract]) OR homograft*[Title/Abstract]) OR homologous[Title/Abstract]) OR allogeneic*[Title/Abstract]         |
| #17           | #15 OR #16                                                                                                                         |
| #18           | #7 AND #11 AND #14 AND #17                                                                                                         |

---

**EMBASE**

Searched on: January 31, 2016

Results: 187

---

**Search Query**

- #1 'randomized controlled trial'/exp
- #2 'controlled clinical trial'/exp
- #3 random\*:ab,ti
- #4 placebo:ab,ti
- #5 Trial\*:ab,ti
- #6 Group\*:ab,ti
- #7 #1 OR #2 OR #3 OR #4 OR #5 OR #6
- #8 'animal'/exp
- #9 'human'/exp
- #10 #8 NOT #9
- #11 #7 NOT #10
- #12 'anterior cruciate ligament'/exp
- #13 'anterior cruciate ligament reconstruction'/exp
- #14 'anterior cruciate ligament reconstruction':ab,ti
- #15 'anterior cruciate ligament':ab,ti
- #16 ACL:ab,ti
- #17 anterior:ab,ti
- #18 cruciate\*:ab,ti
- #19 ligament\*:ab,ti
- #20 #17 AND #18 AND #19
- #21 #12 OR #13 OR #14 OR #15 OR #16 OR #20
- #22 'autotransplantation'/exp
- #23 autologous:ab,ti
- #24 autogenous:ab,ti
- #25 autotransplant\*:ab,ti
- #26 autograft\*:ab,ti
- #27 #22 OR #23 OR #24 OR #25 OR #26
- #28 'allotransplantation'/exp

#29 allograft\*:ab,ti  
#30 homograft\*:ab,ti  
#31 homologous:ab,ti  
#32 allogeneic\*:ab,ti  
#33 #28 OR #29 OR #30 OR #31 OR #32  
#34 #11 AND #21 AND #27 AND #33

---

## CENTRAL

Searched on: January 31, 2016

Results: 35

---

### Search Query

#1 MeSH descriptor: [Randomized Controlled Trial] this term only  
#2 MeSH descriptor: [Randomized Controlled Trials as Topic] this term only  
#3 MeSH descriptor: [Controlled Clinical Trial] this term only  
#4 MeSH descriptor: [Controlled Clinical Trials as Topic] this term only  
#5 Random\*:ti,ab,kw or placebo:ti,ab,kw or trial\*:ti,ab,kw or group\*:ti,ab,kw  
(Word variations have been searched)  
#6 #1 or #2 or #3 or #4 or #5  
#7 MeSH descriptor: [Animals] explode all trees  
#8 MeSH descriptor: [Humans] explode all trees  
#9 #7 not #8  
#10 #6 not #9  
#11 MeSH descriptor: [Anterior Cruciate Ligament] explode all trees  
#12 MeSH descriptor: [Anterior Cruciate Ligament Reconstruction] explode all trees  
#13 Anterior Cruciate Ligament:ti,ab,kw or Anterior Cruciate Ligament  
Reconstruction:ti,ab,kw or ACL:ti,ab,kw (Word variations have been searched)  
#14 anterior:ti,ab,kw and cruciate\*:ti,ab,kw and ligament\*:ti,ab,kw (Word  
variations have been searched)  
#15 #11 or #12 or #13 or #14  
#16 MeSH descriptor: [Transplantation, Autologous] explode all trees  
#17 Autologous:ti,ab,kw or autogenous:ti,ab,kw or autotransplant\*:ti,ab,kw or

- autograft\*:ti,ab,kw (Word variations have been searched)
- #18 #16 or #17
- #19 MeSH descriptor: [Transplantation, Homologous] explode all trees
- #20 Allograft\*:ti,ab,kw or homograft\*:ti,ab,kw or homologous:ti,ab,kw or  
allogeneic\*:ti,ab,kw (Word variations have been searched)
- #21 #19 or #20
- #22 #10 and #15 and #18 and #21 in Trials
-

Supplementary Table S2 GRADE evidence profile

| Quality assessment                                                 |                   |                      |                          |                         |                        |                      | No of patients  |                 | Effect                 |                                               | Quality*         | Importance |
|--------------------------------------------------------------------|-------------------|----------------------|--------------------------|-------------------------|------------------------|----------------------|-----------------|-----------------|------------------------|-----------------------------------------------|------------------|------------|
| No of studies                                                      | Design            | Risk of bias         | Inconsistency            | Indirectness            | Imprecision            | Other considerations | Autograft       | Allograft       | Relative (95% CI)      | Absolute                                      |                  |            |
| <b>Clinical failure</b>                                            |                   |                      |                          |                         |                        |                      |                 |                 |                        |                                               |                  |            |
| 11                                                                 | randomised trials | serious <sup>1</sup> | no serious inconsistency | no serious indirectness | no serious imprecision | none                 | 31/575 (5.4%)   | 79/594 (13.3%)  | RR 0.42 (0.28 to 0.63) | 77 fewer per 1000 (from 49 fewer to 96 fewer) | ⊕⊕⊕⊕<br>MODERATE | CRITICAL   |
|                                                                    |                   |                      |                          |                         |                        |                      |                 | 8.8%            |                        | 51 fewer per 1000 (from 33 fewer to 63 fewer) |                  |            |
| <b>Overall IKDC level</b>                                          |                   |                      |                          |                         |                        |                      |                 |                 |                        |                                               |                  |            |
| 12                                                                 | randomised trials | serious <sup>1</sup> | no serious inconsistency | no serious indirectness | no serious imprecision | none                 | 683/722 (94.6%) | 651/711 (91.6%) | RR 1.03 (1 to 1.06)    | 27 more per 1000 (from 0 more to 55 more)     | ⊕⊕⊕⊕<br>MODERATE | CRITICAL   |
|                                                                    |                   |                      |                          |                         |                        |                      |                 | 90.6%           |                        | 27 more per 1000 (from 0 more to 54 more)     |                  |            |
| <b>Lysholm score (Better indicated by higher values)</b>           |                   |                      |                          |                         |                        |                      |                 |                 |                        |                                               |                  |            |
| 12                                                                 | randomised trials | serious <sup>1</sup> | serious <sup>2</sup>     | no serious indirectness | no serious imprecision | none                 | 721             | 716             | -                      | MD 0.27 higher (0.79 lower to 1.32 higher)    | ⊕⊕⊕⊕<br>LOW      | CRITICAL   |
| <b>Pivot-shift test</b>                                            |                   |                      |                          |                         |                        |                      |                 |                 |                        |                                               |                  |            |
| 13                                                                 | randomised trials | serious <sup>1</sup> | no serious inconsistency | no serious indirectness | no serious imprecision | reporting bias       | 660/775 (85.2%) | 614/763 (80.5%) | RR 1.06 (1.02 to 1.11) | 48 more per 1000 (from 16 more to 89 more)    | ⊕⊕⊕⊕<br>LOW      | CRITICAL   |
|                                                                    |                   |                      |                          |                         |                        |                      |                 | 81.3%           |                        | 49 more per 1000 (from 16 more to 89 more)    |                  |            |
| <b>Lachman test</b>                                                |                   |                      |                          |                         |                        |                      |                 |                 |                        |                                               |                  |            |
| 11                                                                 | randomised trials | serious <sup>1</sup> | serious <sup>3</sup>     | no serious indirectness | no serious imprecision | reporting bias       | 450/567 (79.4%) | 412/587 (70.2%) | RR 1.14 (1.02 to 1.28) | 98 more per 1000 (from 14 more to 197 more)   | ⊕⊕⊕⊕<br>VERY LOW | CRITICAL   |
|                                                                    |                   |                      |                          |                         |                        |                      |                 | 71.1%           |                        | 100 more per 1000 (from 14 more to 199 more)  |                  |            |
| <b>Tegner score (Better indicated by higher values)</b>            |                   |                      |                          |                         |                        |                      |                 |                 |                        |                                               |                  |            |
| 10                                                                 | randomised trials | serious <sup>1</sup> | no serious inconsistency | no serious indirectness | no serious imprecision | none                 | 458             | 487             | -                      | MD 0.26 higher (0.06 to 0.45 higher)          | ⊕⊕⊕⊕<br>MODERATE | CRITICAL   |
| <b>Instrumented laxity test (Better indicated by lower values)</b> |                   |                      |                          |                         |                        |                      |                 |                 |                        |                                               |                  |            |
| 8                                                                  | randomised trials | serious <sup>1</sup> | serious <sup>4</sup>     | no serious indirectness | no serious imprecision | none                 | 455             | 464             | -                      | MD 0.74 lower (1.15 to 0.32 lower)            | ⊕⊕⊕⊕<br>LOW      | CRITICAL   |
| <b>Subjective IKDC score (Better indicated by higher values)</b>   |                   |                      |                          |                         |                        |                      |                 |                 |                        |                                               |                  |            |
| 9                                                                  | randomised        | serious <sup>1</sup> | serious <sup>5</sup>     | no serious              | no serious             | none                 | 523             | 534             | -                      | MD 1.51 higher (0.13                          | ⊕⊕⊕⊕             | CRITICAL   |

|                              | trials            |                      |                      | indirectness            | imprecision            |      |                 |               |                        | lower to 3.14 higher)                         | LOW         |          |
|------------------------------|-------------------|----------------------|----------------------|-------------------------|------------------------|------|-----------------|---------------|------------------------|-----------------------------------------------|-------------|----------|
| <b>Daniel 1-leg hop test</b> |                   |                      |                      |                         |                        |      |                 |               |                        |                                               |             |          |
| 6                            | randomised trials | serious <sup>1</sup> | serious <sup>5</sup> | no serious indirectness | no serious imprecision | none | 292/345 (84.6%) | 342/376 (91%) | RR 0.98 (0.89 to 1.07) | 18 fewer per 1000 (from 100 fewer to 64 more) | ⊕⊕⊕⊕<br>LOW | CRITICAL |
|                              |                   |                      |                      |                         |                        |      |                 | 91.6%         |                        | 18 fewer per 1000 (from 101 fewer to 64 more) |             |          |

IKDC = International Knee Documentation Committee.

<sup>1</sup> All the trials were judged to be at high risk of bias or unclear risk of bias.

<sup>2</sup> Significant heterogeneity ( $I^2 = 59\%$ ) was found.

<sup>3</sup> Significant heterogeneity ( $I^2 = 65\%$ ) was found.

<sup>4</sup> Significant heterogeneity ( $I^2 = 89\%$ ) was found.

<sup>5</sup> Significant heterogeneity ( $I^2 = 72\%$ ) was found.

\*GRADE Working Group grades of evidence: high quality = further research is very unlikely to change our confidence in the estimate of effect; moderate quality = further research is likely to have an important impact on our confidence in the estimate of effect and may change the estimate; low quality = further research is very likely to have an important impact on our confidence in the estimate of effect and is likely to change the estimate; very low quality = we are very uncertain about the estimate.

Supplementary Table S3 Subgroup analyses of autograft compared with allograft

| Subgroup                  | Sample size | Measures of effects size and precision |                         |          | Heterogeneity  |
|---------------------------|-------------|----------------------------------------|-------------------------|----------|----------------|
|                           |             | Point estimate                         | 95% confidence interval | P value  | I <sup>2</sup> |
| <b>Clinical failure</b>   |             |                                        |                         |          |                |
| Total                     | 1169        | 0.42                                   | 0.28 to 0.63            | < 0.0001 | 0%             |
| Irradiation used or not   |             |                                        |                         |          |                |
| Irradiated Allograft      | 381         | 0.23                                   | 0.12 to 0.46            | < 0.0001 | 0%             |
| Nonirradiated Allograft   | 788         | 0.64                                   | 0.38 to 1.05            | 0.08     | 0%             |
| The type of graft         |             |                                        |                         |          |                |
| Soft Tissue               | 713         | 0.49                                   | 0.29 to 0.81            | 0.006    | 0%             |
| BPTB                      | 456         | 0.35                                   | 0.19 to 0.65            | 0.001    | 27%            |
| <b>Overall IKDC level</b> |             |                                        |                         |          |                |
| Total                     | 1433        | 1.03                                   | 1.00 to 1.06            | 0.03     | 0%             |
| Irradiation used or not   |             |                                        |                         |          |                |
| Irradiated Allograft      | 460         | 1.05                                   | 0.99 to 1.12            | 0.08     | 0%             |
| Nonirradiated Allograft   | 973         | 1.02                                   | 0.99 to 1.05            | 0.19     | 0%             |
| The type of graft         |             |                                        |                         |          |                |
| Soft Tissue               | 977         | 1.02                                   | 0.99 to 1.06            | 0.20     | 0%             |
| BPTB                      | 456         | 1.05                                   | 1.00 to 1.10            | 0.05     | 0%             |
| <b>Lysholm score</b>      |             |                                        |                         |          |                |
| Total                     | 1437        | 0.27                                   | -0.79 to 1.32           | 0.62     | 59%            |
| Irradiation used or not   |             |                                        |                         |          |                |
| Irradiated Allograft      | 460         | 2.56                                   | 1.02 to 4.10            | 0.001    | 0%             |
| Nonirradiated Allograft   | 977         | -0.77                                  | -1.37 to -0.17          | 0.01     | 45%            |
| The type of graft         |             |                                        |                         |          |                |
| Soft Tissue               | 875         | -0.12                                  | -0.85 to 0.62           | 0.76     | 45%            |
| BPTB                      | 562         | 0.18                                   | -2.01 to 2.36           | 0.87     | 74%            |
| <b>Pivot-shift test</b>   |             |                                        |                         |          |                |
| Total                     | 1538        | 1.06                                   | 1.02 to 1.11            | 0.008    | 50%            |

|                                 |      |       |                |        |     |  |
|---------------------------------|------|-------|----------------|--------|-----|--|
| <b>Irradiation used or not</b>  |      |       |                |        |     |  |
| Irradiated Allograft            | 459  | 1.21  | 1.04 to 1.40   | 0.01   | 65% |  |
| Nonirradiated Allograft         | 1079 | 1.01  | 0.96 to 1.06   | 0.68   | 0%  |  |
| <b>The type of graft</b>        |      |       |                |        |     |  |
| Soft Tissue                     | 977  | 1.04  | 0.96 to 1.13   | 0.30   | 52% |  |
| BPTB                            | 561  | 1.09  | 0.98 to 1.20   | 0.11   | 52% |  |
| <b>Lachman test</b>             |      |       |                |        |     |  |
| Total                           | 1154 | 1.14  | 1.02 to 1.28   | 0.02   | 65% |  |
| <b>Irradiation used or not</b>  |      |       |                |        |     |  |
| Irradiated Allograft            | 459  | 1.48  | 1.08 to 2.03   | 0.02   | 82% |  |
| Nonirradiated Allograft         | 695  | 1.03  | 0.95 to 1.12   | 0.45   | 0%  |  |
| <b>The type of graft</b>        |      |       |                |        |     |  |
| Soft Tissue                     | 593  | 1.22  | 1.00 to 1.48   | 0.05   | 65% |  |
| BPTB                            | 561  | 1.09  | 0.94 to 1.27   | 0.26   | 69% |  |
| <b>Tegner score</b>             |      |       |                |        |     |  |
| Total                           | 945  | 0.26  | 0.06 to 0.45   | 0.01   | 0%  |  |
| <b>Irradiation used or not</b>  |      |       |                |        |     |  |
| Irradiated Allograft            | 259  | 0.57  | 0.23 to 0.91   | 0.001  | 0%  |  |
| Nonirradiated Allograft         | 686  | 0.10  | -0.14 to 0.34  | 0.41   | 0%  |  |
| <b>The type of graft</b>        |      |       |                |        |     |  |
| Soft Tissue                     | 690  | 0.24  | 0.02 to 0.46   | 0.04   | 0%  |  |
| BPTB                            | 255  | 0.31  | -0.09 to 0.71  | 0.13   | 0%  |  |
| <b>Instrumented laxity test</b> |      |       |                |        |     |  |
| Total                           | 919  | -0.74 | -1.15 to -0.32 | 0.0005 | 89% |  |
| <b>Irradiation used or not</b>  |      |       |                |        |     |  |
| Irradiated Allograft            | 180  | -2.45 | -3.72 to -1.19 | 0.0001 | 79% |  |
| Nonirradiated Allograft         | 739  | -0.10 | -0.22 to 0.01  | 0.08   | 0%  |  |
| <b>The type of graft</b>        |      |       |                |        |     |  |
| Soft Tissue                     | 664  | -0.83 | -1.41 to -0.25 | 0.005  | 90% |  |
| BPTB                            | 255  | -0.81 | -1.72 to 0.09  | 0.08   | 90% |  |



|                              |      |      |               |           |  |     |
|------------------------------|------|------|---------------|-----------|--|-----|
| <b>Subjective IKDC score</b> |      |      |               |           |  |     |
| Total                        | 1057 | 1.51 | -0.13 to 3.14 | 0.07      |  | 72% |
| Irradiation used or not      |      |      |               |           |  |     |
| Irradiated Allograft         | 180  | 3.79 | 1.61 to 5.98  | 0.0007    |  | 0%  |
| Nonirradiated Allograft      | 877  | 0.66 | -1.24 to 2.56 | 0.50      |  | 77% |
| The type of graft            |      |      |               |           |  |     |
| Soft Tissue                  | 696  | 1.32 | -1.33 to 3.96 | 0.33      |  | 70% |
| BPTB                         | 361  | 2.15 | 1.31 to 2.99  | < 0.00001 |  | 0%  |
| <b>Daniel 1-leg hop test</b> |      |      |               |           |  |     |
| Total                        | 788  | 0.99 | 0.91 to 1.07  | 0.81      |  | 72% |
| Irradiation used or not      |      |      |               |           |  |     |
| Irradiated Allograft         | 396  | 0.96 | 0.79 to 1.17  | 0.70      |  | 87% |
| Nonirradiated Allograft      | 392  | 1.01 | 0.96 to 1.06  | 0.72      |  | 0%  |
| The type of graft            |      |      |               |           |  |     |
| Soft Tissue                  | 332  | 1.03 | 0.97 to 1.09  | 0.38      |  | 0%  |
| BPTB                         | 456  | 0.95 | 0.80 to 1.12  | 0.52      |  | 87% |

IKDC = International Knee Documentation Committee, BPTB = bone-patellar tendon-bone.

Supplementary Table S4 Sensitivity analyses

| Sensitivity analysis              | Sample size | Measures of effects size and precision |               |           | Heterogeneity  |
|-----------------------------------|-------------|----------------------------------------|---------------|-----------|----------------|
|                                   |             | Point estimate                         | 95% CI        | P value   | I <sup>2</sup> |
| <b>Clinical failure</b>           |             |                                        |               |           |                |
| All studies (RR)                  | 1169        | 0.42                                   | 0.28 to 0.63  | < 0.0001  | 0%             |
| All studies (OR)                  | 1169        | 0.38                                   | 0.25 to 0.59  | < 0.0001  | 7%             |
| Excluding the largest trial       | 968         | 0.49                                   | 0.32 to 0.76  | 0.002     | 0%             |
| Excluding the most weighted trial | 968         | 0.49                                   | 0.32 to 0.76  | 0.002     | 0%             |
| Excluding Bottoni 2015            | 1072        | 0.44                                   | 0.29 to 0.68  | 0.0002    | 0%             |
| Excluding Lawhorn 2012            | 1067        | 0.41                                   | 0.27 to 0.61  | < 0.0001  | 0%             |
| Excluding Sun 2009a1              | 1119        | 0.41                                   | 0.28 to 0.62  | < 0.0001  | 2%             |
| Excluding Sun 2009a2              | 1120        | 0.45                                   | 0.30 to 0.67  | 0.0001    | 0%             |
| Excluding Sun 2009b               | 1013        | 0.38                                   | 0.25 to 0.59  | < 0.00001 | 0%             |
| Excluding Sun 2011a               | 1102        | 0.45                                   | 0.30 to 0.68  | 0.0002    | 0%             |
| <b>Overall IKDC level</b>         |             |                                        |               |           |                |
| All studies (RR)                  | 1433        | 1.03                                   | 1.00 to 1.06  | 0.03      | 0%             |
| All studies (OR)                  | 1433        | 1.58                                   | 1.04 to 2.40  | 0.03      | 0%             |
| Excluding the largest trial       | 1151        | 1.04                                   | 1.00 to 1.07  | 0.04      | 0%             |
| Excluding the most weighted trial | 1151        | 1.04                                   | 1.00 to 1.07  | 0.04      | 0%             |
| Excluding Bi 2013                 | 1354        | 1.03                                   | 1.00 to 1.06  | 0.03      | 0%             |
| Excluding Lawhorn 2012            | 1331        | 1.04                                   | 1.00 to 1.07  | 0.02      | 0%             |
| Excluding Sun 2009a1              | 1383        | 1.03                                   | 1.00 to 1.06  | 0.03      | 0%             |
| Excluding Sun 2009a2              | 1384        | 1.03                                   | 1.00 to 1.06  | 0.04      | 0%             |
| Excluding Sun 2009b               | 1277        | 1.03                                   | 1.00 to 1.07  | 0.03      | 0%             |
| Excluding Sun 2011a               | 1366        | 1.03                                   | 1.00 to 1.06  | 0.04      | 0%             |
| <b>Lysholm score</b>              |             |                                        |               |           |                |
| All studies (MD)                  | 1437        | 0.27                                   | -0.79 to 1.32 | 0.62      | 59%            |

|                                   |      |      |               |       |     |
|-----------------------------------|------|------|---------------|-------|-----|
| All studies (SMD)                 | 1437 | 0.03 | -0.14 to 0.20 | 0.73  | 59% |
| Excluding the largest trial       | 1155 | 0.51 | -0.80 to 1.82 | 0.45  | 62% |
| Excluding the most weighted trial | 1155 | 0.51 | -0.80 to 1.82 | 0.45  | 62% |
| Excluding Bi 2013                 | 1358 | 0.17 | -0.92 to 1.25 | 0.76  | 61% |
| Excluding Sun 2009a1              | 1387 | 0.33 | -0.77 to 1.43 | 0.55  | 63% |
| Excluding Sun 2009a2              | 1388 | 0.18 | -0.89 to 1.25 | 0.74  | 61% |
| Excluding Sun 2009b               | 1281 | 0.44 | -0.71 to 1.60 | 0.45  | 62% |
| Excluding Sun 2011a               | 1370 | 0.20 | -0.88 to 1.29 | 0.71  | 61% |
| <b>Pivot-shift test</b>           |      |      |               |       |     |
| All studies (RR)                  | 1538 | 1.06 | 1.02 to 1.11  | 0.008 | 50% |
| All studies (OR)                  | 1538 | 1.45 | 1.10 to 1.92  | 0.008 | 26% |
| Excluding the largest trial       | 1256 | 1.07 | 1.01 to 1.15  | 0.03  | 51% |
| Excluding the most weighted trial | 1256 | 1.07 | 1.01 to 1.15  | 0.03  | 51% |
| Excluding Bi 2013                 | 1459 | 1.06 | 0.99 to 1.14  | 0.07  | 54% |
| Excluding Lawhorn 2012            | 1436 | 1.07 | 1.02 to 1.12  | 0.005 | 52% |
| Excluding Sun 2009a1              | 1488 | 1.06 | 1.00 to 1.13  | 0.07  | 54% |
| Excluding Sun 2009a2              | 1489 | 1.05 | 1.01 to 1.10  | 0.03  | 35% |
| Excluding Sun 2009b               | 1382 | 1.07 | 1.00 to 1.14  | 0.06  | 53% |
| Excluding Sun 2011a               | 1471 | 1.05 | 1.00 to 1.09  | 0.04  | 34% |
| <b>Lachman test</b>               |      |      |               |       |     |
| All studies (RR)                  | 1154 | 1.14 | 1.02 to 1.28  | 0.02  | 65% |
| All studies (OR)                  | 1154 | 1.84 | 1.18 to 2.85  | 0.007 | 53% |
| Excluding the largest trial       | 954  | 1.17 | 1.02 to 1.34  | 0.03  | 69% |
| Excluding the most weighted trial | 954  | 1.17 | 1.02 to 1.34  | 0.03  | 69% |
| Excluding Bi 2013                 | 1075 | 1.15 | 1.02 to 1.30  | 0.03  | 69% |
| Excluding Sun 2009a1              | 1104 | 1.16 | 1.02 to 1.31  | 0.02  | 69% |
| Excluding Sun 2009a2              | 1105 | 1.10 | 1.03 to 1.18  | 0.003 | 48% |
| Excluding Sun 2009b               | 998  | 1.17 | 1.03 to 1.34  | 0.02  | 68% |

|                                   |      |       |                |           |     |
|-----------------------------------|------|-------|----------------|-----------|-----|
| Excluding Sun 2011a               | 1087 | 1.09  | 1.03 to 1.17   | 0.007     | 47% |
| <b>Tegner score</b>               |      |       |                |           |     |
| All studies (MD)                  | 945  | 0.26  | 0.06 to 0.45   | 0.01      | 0%  |
| All studies (SMD)                 | 945  | 0.16  | 0.03 to 0.28   | 0.02      | 0%  |
| Excluding the largest trial       | 759  | 0.29  | 0.07 to 0.50   | 0.008     | 0%  |
| Excluding the most weighted trial | 759  | 0.29  | 0.07 to 0.50   | 0.008     | 0%  |
| Excluding Bi 2013                 | 866  | 0.20  | -0.01 to 0.41  | 0.06      | 0%  |
| Excluding Bottoni 2015            | 848  | 0.25  | 0.05 to 0.45   | 0.01      | 0%  |
| Excluding Sun 2009a1              | 895  | 0.26  | 0.06 to 0.46   | 0.01      | 0%  |
| Excluding Sun 2009a2              | 896  | 0.23  | 0.03 to 0.43   | 0.02      | 0%  |
| Excluding Sun 2009b               | 789  | 0.26  | 0.06 to 0.47   | 0.01      | 0%  |
| Excluding Sun 2011a               | 878  | 0.22  | 0.02 to 0.43   | 0.03      | 0%  |
| <b>Instrumented laxity test</b>   |      |       |                |           |     |
| All studies (MD)                  | 919  | -0.74 | -1.15 to -0.32 | 0.0005    | 89% |
| All studies (SMD)                 | 919  | -0.49 | -0.81 to -0.17 | 0.002     | 80% |
| Excluding the largest trial       | 637  | -0.98 | -1.54 to -0.42 | 0.0006    | 89% |
| Excluding the most weighted trial | 637  | -0.98 | -1.54 to -0.42 | 0.0006    | 89% |
| Excluding Sun 2009a1              | 869  | -0.86 | -1.34 to -0.39 | 0.0004    | 90% |
| Excluding Sun 2009a2              | 870  | -0.52 | -0.88 to -0.15 | 0.006     | 86% |
| Excluding Sun 2009b               | 763  | -0.94 | -1.47 to -0.41 | 0.0005    | 90% |
| Excluding Sun 2011a               | 852  | -0.46 | -0.80 to -0.12 | 0.008     | 83% |
| <b>Subjective IKDC score</b>      |      |       |                |           |     |
| All studies (MD)                  | 1057 | 1.51  | -0.13 to 3.14  | 0.07      | 72% |
| All studies (SMD)                 | 1057 | 0.24  | -0.02 to 0.50  | 0.07      | 75% |
| Excluding the largest trial       | 775  | 2.21  | 1.44 to 2.98   | < 0.00001 | 0%  |
| Excluding the most weighted trial | 951  | 1.36  | -0.58 to 3.29  | 0.17      | 58% |
| Excluding Bottoni 2015            | 960  | 1.47  | -0.22 to 3.15  | 0.09      | 75% |

|                                   |      |      |               |      |     |
|-----------------------------------|------|------|---------------|------|-----|
| Excluding Sun 2009a1              | 1007 | 1.66 | -0.05 to 3.37 | 0.06 | 75% |
| Excluding Sun 2009a2              | 1008 | 1.39 | -0.31 to 3.08 | 0.11 | 75% |
| Excluding Sun 2009b               | 901  | 1.45 | -0.37 to 3.28 | 0.12 | 75% |
| Excluding Sun 2011a               | 990  | 1.30 | -0.41 to 3.01 | 0.14 | 74% |
| <b>Daniel 1-leg hop test</b>      |      |      |               |      |     |
| All studies (RR)                  | 788  | 0.99 | 0.91 to 1.07  | 0.81 | 72% |
| All studies (OR)                  | 788  | 0.64 | 0.40 to 1.00  | 0.05 | 48% |
| Excluding the largest trial       | 587  | 1.02 | 0.98 to 1.07  | 0.31 | 0%  |
| Excluding the most weighted trial | 632  | 0.98 | 0.89 to 1.09  | 0.76 | 77% |
| Excluding Bi 2013                 | 709  | 0.98 | 0.89 to 1.08  | 0.70 | 77% |
| Excluding Sun 2009a1              | 738  | 0.98 | 0.89 to 1.08  | 0.75 | 76% |
| Excluding Sun 2009a2              | 739  | 0.98 | 0.90 to 1.08  | 0.71 | 77% |
| Excluding Sun 2009b               | 632  | 0.98 | 0.89 to 1.09  | 0.76 | 77% |
| Excluding Sun 2011a               | 721  | 0.98 | 0.89 to 1.07  | 0.61 | 75% |

IKDC = International Knee Documentation Committee, CI = confidence interval, RR = relative risk, OR = odds ratio, MD = mean difference,

SMD = standardized mean difference.
